# Supplementary material for: CD155T/TIGIT Signaling Regulates CD8+ T-cell Metabolism and Promotes Tumor Progression in Human Gastric Cancer
Source: Oxford University Press journal article supplement (doi:10.1158/0008-5472.can-17-0381), 2017-09-07
Supplement: 00085472can170381-sup-178611_2_supp_4221545_llvgl5.docx [file 00085472can170381-sup-178611_2_supp_4221545_llvgl5.docx]

Supplementary Table 1. Clinicopathological characteristics of the 138 patients in this study

| Age (years)  Median (range) | 54.5 (26–78) |
| --- | --- |
| Gender (No.)  Male/female  Histological diagnosis (No.)  Tubular adenocarcinoma  Papillary adenocarcinoma  Mucinous adenocarcinoma  Poorly cohesive carcinoma  Signet-ring cell carcinoma  Disease stage (No.)  I/II  III/IV  Lymph node metastasis (No.)  N0  N1  N2  N3  Distance metastasis  M0  M1  Recurrent (No.) | 70/68  42  34  14  33  15  35  103  62  33  28  15    95  43  12 |
